# Supplementary material for: The expression and prognostic value of disulfidptosis progress in lung adenocarcinoma
Source: Aging (Albany NY). 2023 Aug 7;15(15):7741–59. doi: 10.18632/aging.204938 (PMC10457049; doi:10.18632/aging.204938)
Supplement: Supplementary Figures [file aging-15-204938-s001.pdf]

## SUPPLEMENTARY FIGURES

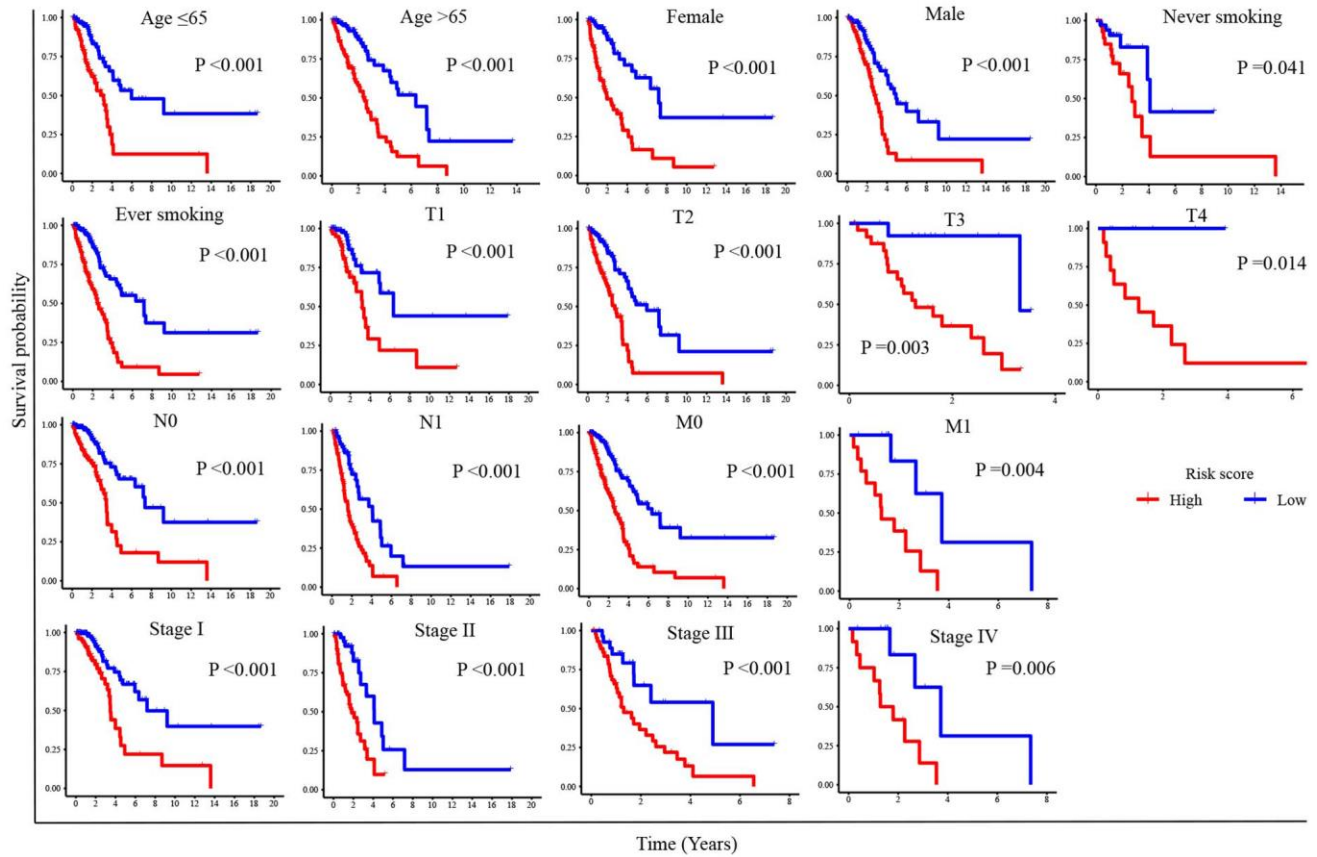

Supplementary Figure 1. Stratification analyses of overall survival between high- and low-risk patients in different subgroup.

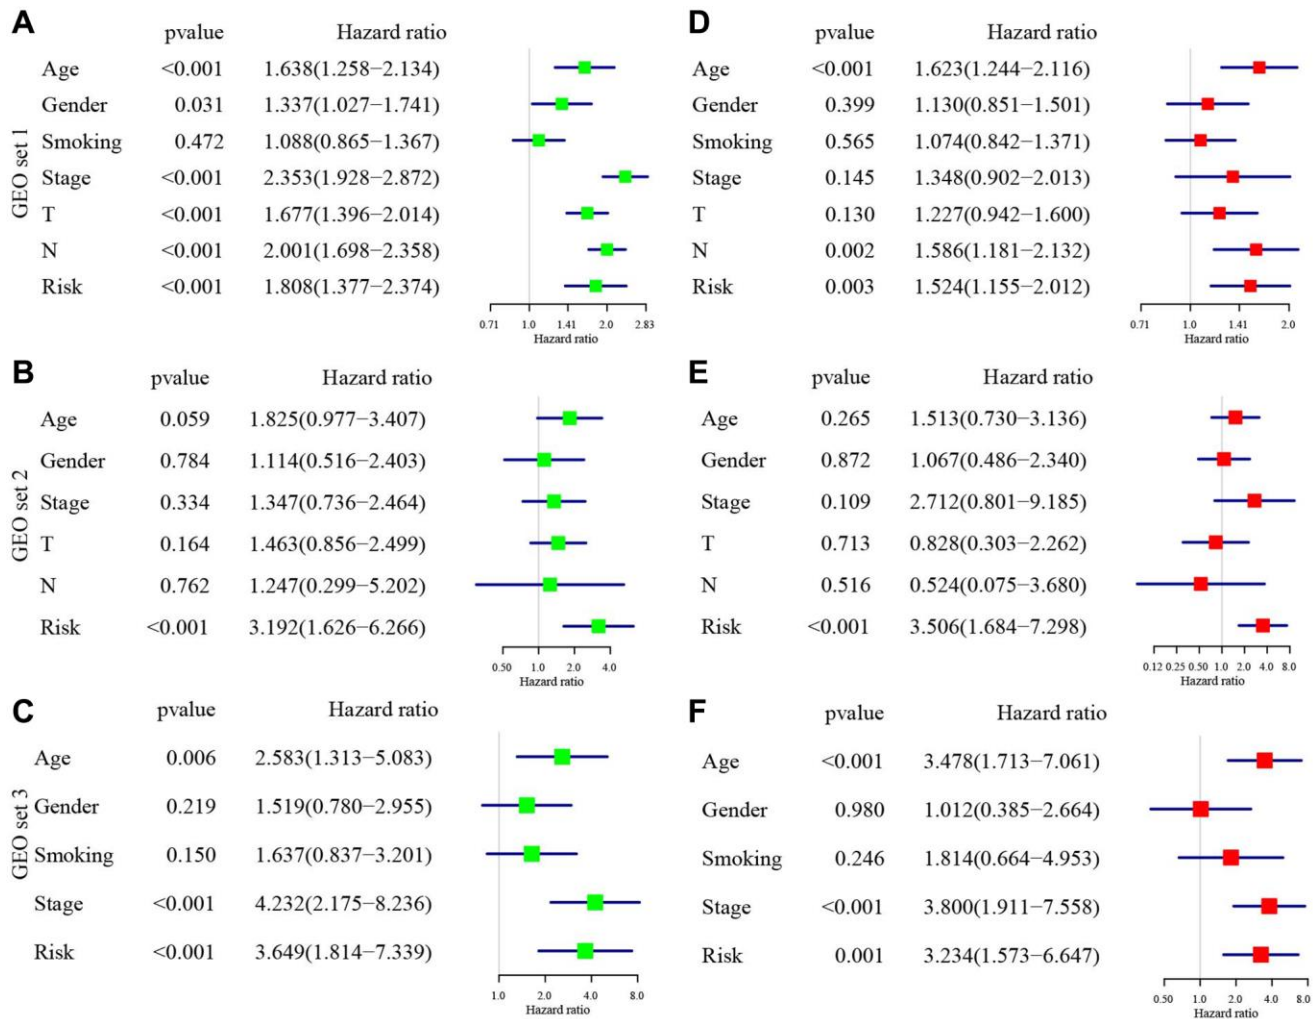

**Supplementary Figure 2.** The univariate Cox regression analysis of risk score and clinical characteristics in (A) GEO set 1, (B) GEO set 2, (C) GEO set 3. The multivariate Cox regression analysis of risk score and clinical characteristics in (D) GEO set 1, (E) GEO set 2, (F) GEO set 3.

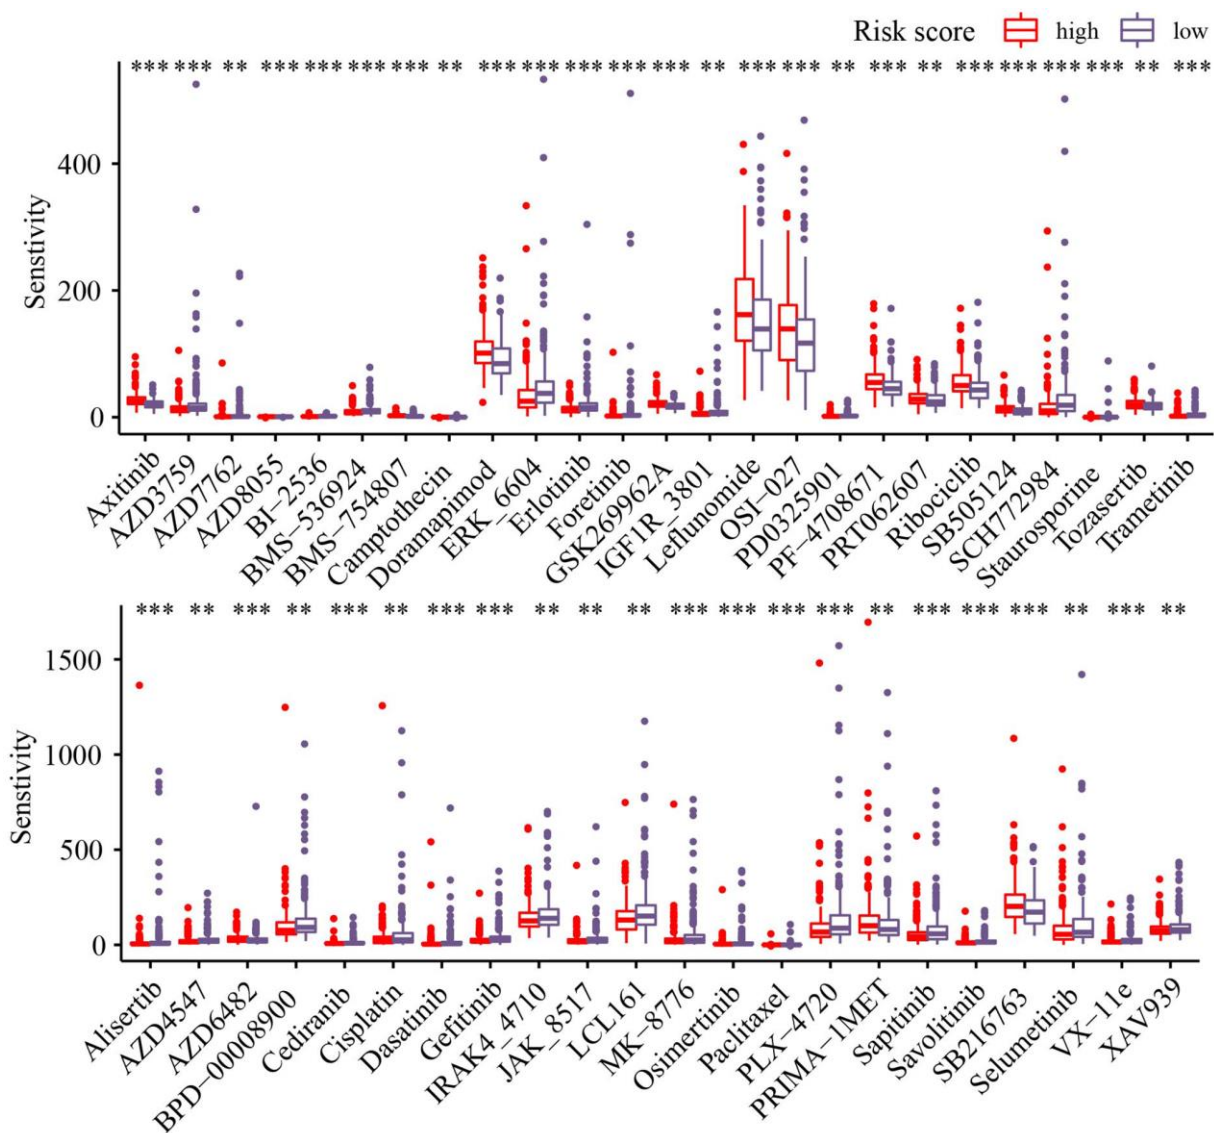

Supplementary Figure 3. Drug sensitivity analysis between high- and low-risk patients.
